# Supplementary material for: Facile synthesis of colloidal photoluminescent BiPO4:Ln (Eu,Tb) nanoparticles well-dispersed in polar solvents
Source: Royal Society of Chemistry journal article supplement (doi:10.1039/c8ce01363b), 2018-11-21
Supplement: c8ce01363b1.pdf [file c8ce01363b1.pdf]

## Supporting Information

### Facile synthesis of colloidal photoluminescence $\text{BiPO}_4\text{:Ln}$ (Eu, Tb) nanoparticles well-dispersed in the polar solvent

Maozhan Huang, Zhou Xu, Cheng Hou, Hai-lang Jia, Jianhua Sun, Mingyun Guan.\*

Institute of Advanced Functional Materials for Energy, School of Chemical and Environmental Engineering, Jiangsu University of Technology, Changzhou Jiangsu 213001 P. R. China.

#### SI-1. TEM, STEM images and EDS element mapping of $\text{BiPO}_4\text{:Eu}$ nanoparticles

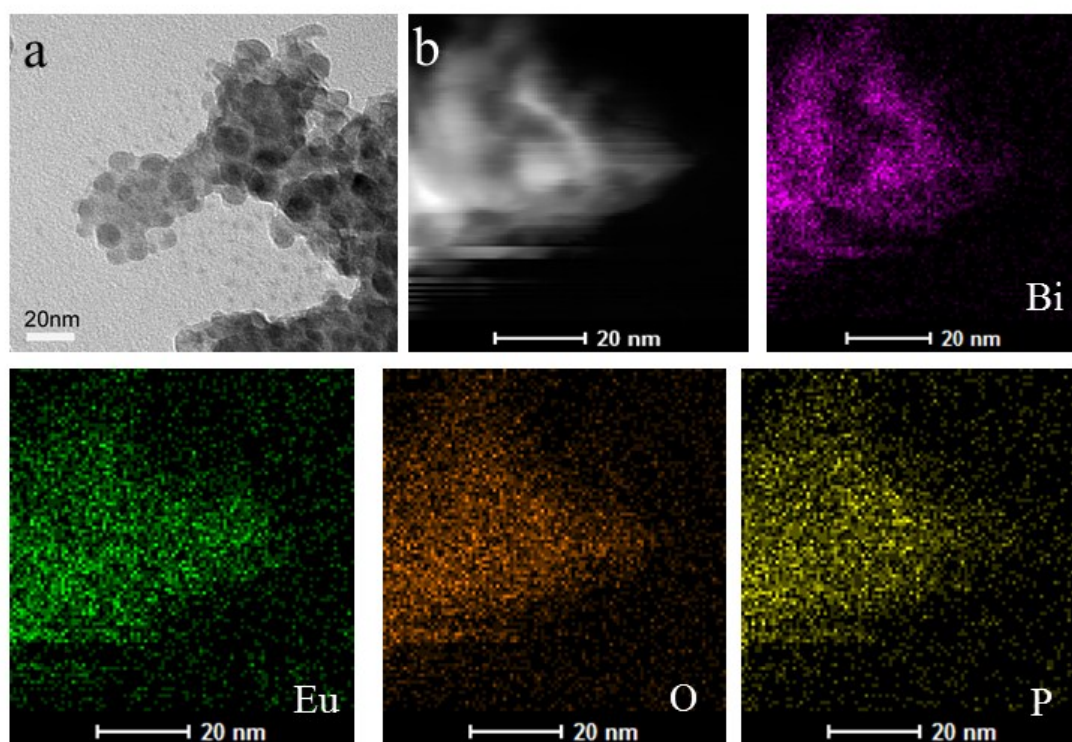

**Fig. S1** Image of  $\text{BiPO}_4\text{:Eu}$  obtained after long exposure of high-energy electron irradiation: (a) TEM, (b) STEM and the corresponding EDS element mapping including Bi, Eu, O, and P, respectively.

#### SI-2. SEM and TEM images of $\text{BiPO}_4$ urchin-like structure <sup>5</sup>

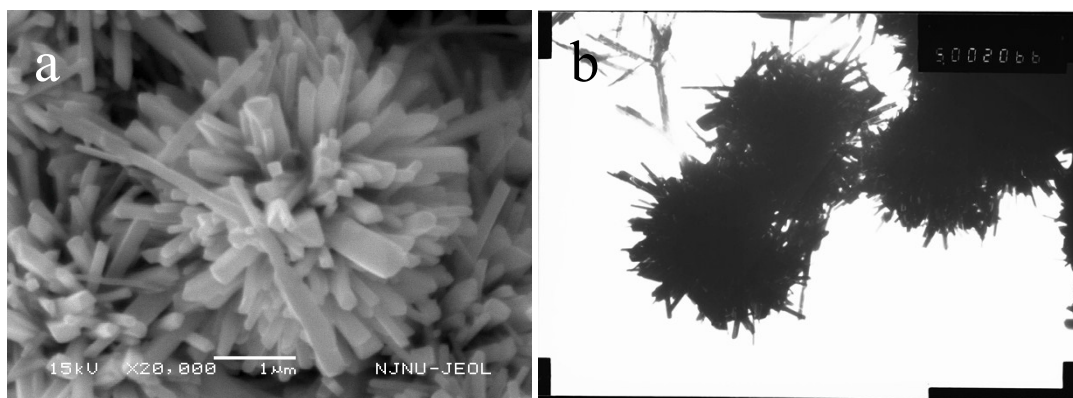

**Fig. S2** (a) SEM and b) TEM images of BiPO<sub>4</sub> urchin respectively.

### SI-3. The digital photographs of BiPO<sub>4</sub>:Eu powders

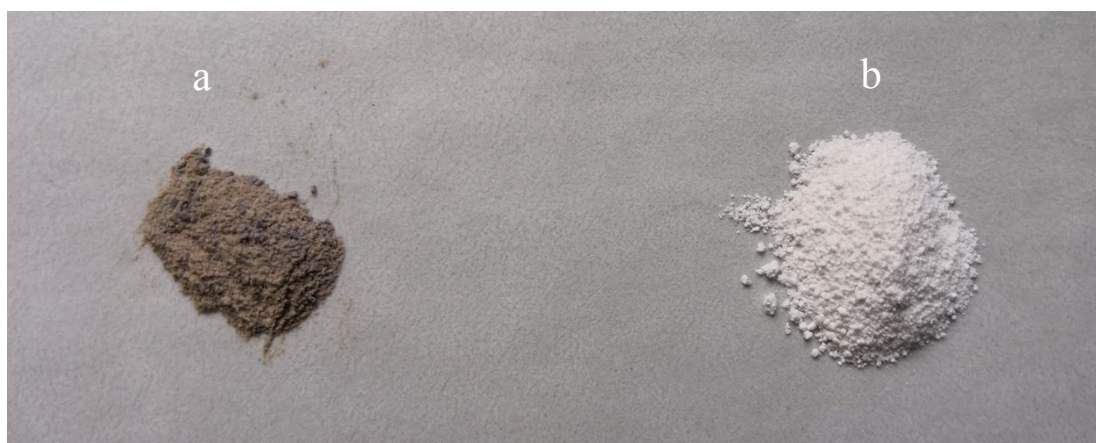

**Fig. S3** The digital photographs of BiPO<sub>4</sub>:Eu powders obtained in the absence of NaOH (a) and by NaOH (b).
